# Supplementary material for: Estrogen receptor signaling regulates the expression of the breast tumor kinase in breast cancer cells
Source: PubMed Central journal article supplement (PMC6335685; doi:10.1186/s12885-018-5186-8), 2019-01-16
Supplement: 12885_2018_5186_MOESM1_ESM.pdf [file 12885_2018_5186_MOESM1_ESM.pdf]

**Supplementary Table 1: Differential expression of BRK mRNA in various cancers**

| Cancer                                       | Sample size (Normal/tumor) | BRK expression in tumors relative to normal tissue | pValue                        | Significance    |
|----------------------------------------------|----------------------------|----------------------------------------------------|-------------------------------|-----------------|
| BLCA (bladder urothelial carcinoma)          | 19/405                     | High                                               | 0.018                         | Significant     |
| <b>BRCA (breast carcinoma)</b>               | 100/1084                   | High                                               | <b>1.2 x 10<sup>-31</sup></b> | Significant     |
| CESC (cervical squamous cell carcinoma)      | 3/297                      | High                                               | 0.012                         | Significant     |
| CHOL (cholangiocarcinoma)                    | 9/36                       | High                                               | 0.039                         | Significant     |
| COAD (colon adenocarcinoma)                  | 41/476                     | Low                                                | 2.3 x 10 <sup>-09</sup>       | Significant     |
| ESCA (esophageal cancer)                     | 11/173                     | High                                               | 0.276                         | Not significant |
| GBM (glioblastoma multiforme)                | 5/143                      | Low                                                | 0.023                         | Significant     |
| HNSC (head and neck squamous cell carcinoma) | 44/515                     | Low                                                | 3.0 x 10 <sup>-09</sup>       | Significant     |
| KICH (cervical squamous cell carcinoma)      | 25/66                      | Low                                                | 1.1 x 10 <sup>-07</sup>       | Significant     |
| KIRC (clear cell kidney carcinoma)           | 72/529                     | High                                               | 0.0004                        | Significant     |
| KIRP (papillary kidney carcinoma)            | 32/289                     | High                                               | 0.0001                        | Significant     |
| LIHC (liver hepatocellular carcinoma)        | 51/369                     | Low                                                | 0.0009                        | Significant     |
| LUAD (lung adenocarcinoma)                   | 58/512                     | High                                               | 1.1 x 10 <sup>-15</sup>       | Significant     |
| LUSC (lung squamous cell carcinoma)          | 51/498                     | High                                               | 7.5 x 10 <sup>-06</sup>       | Significant     |
| PAAD (pancreatic ductal carcinoma)           | 4/178                      | High                                               | 0.007                         | Significant     |
| PCPG (pheochromocytoma and paraganglioma)    | 3/176                      | High                                               | 0.002                         | Significant     |
| PRAD (prostate adenocarcinoma)               | 51/483                     | High                                               | 0.0001                        | Significant     |
| READ (rectal adenocarcinoma)                 | 10/163                     | High                                               | 0.1899                        | Not significant |
| SARC (sarcoma)                               | 2/258                      | Inconclusive                                       | 0.305                         | Not significant |
| SKCM (cutaneous melanoma)                    | 1/104                      | Inconclusive                                       | 0.153                         | Not significant |
| STAD (stomach adenocarcinoma)                | 35/413                     | Low                                                | 0.034                         | Significant     |
| THCA (papillary thyroid carcinoma)           | 57/500                     | High                                               | 1.2 x 10 <sup>-08</sup>       | Significant     |
| THYM (thymoma)                               | 2/120                      | Inconclusive                                       | 0.329                         | Not significant |
| UCEC (uterine corpus endometrial carcinoma)  | 35/540                     | High                                               | 6.0 x 10 <sup>-09</sup>       | Significant     |

p &lt; 0.05 = significant

**Supplementary Table 2:** BRK mRNA expression in a TCGA cohort of breast cancer subtypes

| Subtype      | No of patients in group |     | Significance against the normal tissue (pValue) |
|--------------|-------------------------|-----|-------------------------------------------------|
|              | High                    | Low |                                                 |
| Normal       | 114                     |     | -                                               |
| Luminal      | 492                     |     | $8.1 \times 10^{-45}$                           |
| HER2         | 39                      |     | $2.3 \times 10^{-11}$                           |
| TNBC         | 152                     |     | 0.002                                           |
| Breast tumor | 104                     |     | $3.4 \times 10^{-36}$                           |

### Supplementary Table 3

| catalognum | position | age(41-52) | organ  | pathology                                                | grade | stage | tnm    | type      |
|------------|----------|------------|--------|----------------------------------------------------------|-------|-------|--------|-----------|
| BR243d     | A1       |            | Breast | Invasive ductal carcinoma                                | 2     | IIb   | T2N1M0 | Malignant |
| BR243d     | A2       |            | Breast | Invasive ductal carcinoma                                | 2     | IIb   | T2N1M0 | Malignant |
| BR243d     | A3       |            | Breast | Cancer adjacent normal breast tissue                     |       |       | -      | NAT       |
| BR243d     | A4       |            | Breast | Cancer adjacent normal breast tissue (fibrofatty tissue) |       |       | -      | NAT       |
| BR243d     | A5       |            | Breast | Invasive ductal carcinoma                                | 2     | IIb   | T2N1M0 | Malignant |
| BR243d     | A6       |            | Breast | Invasive ductal carcinoma                                | 2     | IIb   | T2N1M0 | Malignant |
| BR243d     | A7       |            | Breast | Cancer adjacent normal breast tissue                     |       |       | -      | NAT       |
| BR243d     | A8       |            | Breast | Cancer adjacent normal breast tissue                     |       |       | -      | NAT       |
| BR243d     | B1       |            | Breast | Invasive ductal carcinoma                                | 2     | IIIa  | T2N2M0 | Malignant |
| BR243d     | B2       |            | Breast | Invasive ductal carcinoma                                | 2     | IIIa  | T2N2M0 | Malignant |
| BR243d     | B3       |            | Breast | Cancer adjacent normal breast tissue                     |       |       | -      | NAT       |
| BR243d     | B4       |            | Breast | Cancer adjacent normal breast tissue                     |       |       | -      | NAT       |
| BR243d     | B5       |            | Breast | Invasive ductal carcinoma                                | 2     | IIa   | T2N0M0 | Malignant |
| BR243d     | B6       |            | Breast | Invasive ductal carcinoma                                | 2     | IIa   | T2N0M0 | Malignant |
| BR243d     | B7       |            | Breast | Cancer adjacent normal breast tissue (fibrofatty tissue) |       |       | -      | NAT       |
| BR243d     | B8       |            | Breast | Cancer adjacent normal breast tissue                     |       |       | -      | NAT       |
| BR243d     | C1       |            | Breast | Invasive ductal carcinoma                                | 2     | IIa   | T2N0M0 | Malignant |
| BR243d     | C2       |            | Breast | Invasive ductal carcinoma                                | 2     | IIa   | T2N0M0 | Malignant |
| BR243d     | C3       |            | Breast | Cancer adjacent normal breast tissue (adenosis)          |       |       | -      | NAT       |
| BR243d     | C4       |            | Breast | Cancer adjacent normal breast tissue                     |       |       | -      | NAT       |
| BR243d     | C5       |            | Breast | Invasive ductal carcinoma                                | 2     | IIb   | T3N1M0 | Malignant |
| BR243d     | C6       |            | Breast | Invasive ductal carcinoma                                | 2     | IIb   | T3N1M0 | Malignant |
| BR243d     | C7       |            | Breast | Cancer adjacent normal breast tissue                     |       |       | -      | NAT       |
| BR243d     | C8       |            | Breast | Cancer adjacent normal breast tissue                     |       |       | -      | NAT       |

# Supplementary Table 4

| catalognum | position | age (28-80) and Organ                                            | pathology      | grade | stage  | tnm    | er       | pr       | her2 | type      |            |
|------------|----------|------------------------------------------------------------------|----------------|-------|--------|--------|----------|----------|------|-----------|------------|
| BR10010a   | A1       | Breast                                                           | Invasive duct  |       | 1 IIIa | T2N2M0 | -        | -        | 3+   | Malignant |            |
| BR10010a   | A2       | Breast                                                           | Invasive duct  |       | 1 IIa  | T1N1M0 | -        | -        | 2+   | Malignant |            |
| BR10010a   | A3       | Breast                                                           | Invasive duct  |       | 1 IIb  | T2N1M0 | +++ ,95% | +++ ,65% | 0    | Malignant |            |
| BR10010a   | A4       | Breast                                                           | Invasive duct  |       | 1 IIb  | T2N1M0 | + ,35%   | ++ ,60%  | 0    | Malignant |            |
| BR10010a   | A5       | Breast                                                           | Invasive duct  |       | 1 IIb  | T3N1M0 | -        | -        | 0    | Malignant |            |
| BR10010a   | A6       | Breast                                                           | Invasive duct  |       | 2 IIb  | T2N1M0 | -        | -        | 3+   | Malignant |            |
| BR10010a   | A7       | Breast                                                           | Invasive duct  |       | 2 IIIa | T2N2M0 | ++ ,95%  | ++ ,80%  | 1+   | Malignant |            |
| BR10010a   | A8       | Breast                                                           | Invasive duct  |       | 2 IIb  | T2N1M0 | -        | + ,45%   | 2+   | Malignant |            |
| BR10010a   | A9       | Breast                                                           | Invasive duct  |       | 2 IIb  | T2N1M0 | +++ ,90% | +++ ,70% | 0    | Malignant |            |
| BR10010a   | A10      | Breast                                                           | Invasive duct  |       | 2 IIb  | T2N1M0 | -        | -        | 0    | Malignant |            |
| BR10010a   | B1       | Breast                                                           | Invasive duct  |       | 2 IIIa | T2N2M0 | + ,15%   | + ,5%    | 0    | Malignant |            |
| BR10010a   | B2       | Breast                                                           | Invasive duct  |       | 2 IIb  | T2N1M0 | -        | -        | 0    | Malignant |            |
| BR10010a   | B3       | Breast                                                           | Invasive duct  |       | 2 IIb  | T2N1M0 | -        | + ,40%   | 0    | Malignant |            |
| BR10010a   | B4       | Breast                                                           | Invasive duct  |       | 2 IIIb | T4N2M0 | + ,20%   | +++ ,99% | 0    | Malignant |            |
| BR10010a   | B5       | Breast                                                           | Invasive duct  |       | 2 IIIa | T2N2M0 | -        | -        | 3+   | Malignant |            |
| BR10010a   | B6       | Breast                                                           | Invasive duct  |       | 2 IIb  | T2N1M0 | -        | -        | 3+   | Malignant |            |
| BR10010a   | B7       | Breast                                                           | Invasive duct  |       | 2 IIIa | T2N2M0 | -        | + ,10%   | 0    | Malignant |            |
| BR10010a   | B8       | Breast                                                           | Invasive duct  |       | 2 IIb  | T3N1M0 | -        | -        | 3+   | Malignant |            |
| BR10010a   | B9       | Breast                                                           | Invasive duct  |       | 2 IIb  | T2N1M0 | -        | -        | 2+   | Malignant |            |
| BR10010a   | B10      | Breast                                                           | Invasive duct  |       | 2 IIb  | T2N1M0 | -        | -        | 0    | Malignant |            |
| BR10010a   | C1       | Breast                                                           | Invasive duct  |       | 2 IIIa | T2N2M0 | -        | ++ ,55%  | 1+   | Malignant |            |
| BR10010a   | C2       | Breast                                                           | Invasive duct  |       | 2 IIb  | T3N1M0 | + ,20%   | +++ ,10% | 0    | Malignant |            |
| BR10010a   | C3       | Breast                                                           | Invasive duct  |       | 1 IIb  | T2N1M0 | -        | -        | 3+   | Malignant |            |
| BR10010a   | C4       | Breast                                                           | Invasive duct  |       | 2 IIb  | T2N1M0 | -        | -        | 0    | Malignant |            |
| BR10010a   | C5       | Breast                                                           | Invasive duct  |       | 2 IIIa | T2N2M0 | -        | -        | 1+   | Malignant |            |
| BR10010a   | C6       | Breast                                                           | Invasive duct  |       | 2 IIIa | T3N2M0 | -        | -        | 2+   | Malignant |            |
| BR10010a   | C7       | Breast                                                           | Invasive duct  |       | 2 IIIa | T2N2M0 | + ,10%   | -        | 3+   | Malignant |            |
| BR10010a   | C8       | Breast                                                           | Invasive duct  |       | 2 IIIb | T4N1M0 | + ,5%    | -        | 3+   | Malignant |            |
| BR10010a   | C9       | Breast                                                           | Invasive duct  |       | 2 IIIa | T2N2M0 | + ,80%   | ++ ,8%   | 0    | Malignant |            |
| BR10010a   | C10      | Breast                                                           | Invasive duct  |       | 2 IIb  | T2N1M0 | -        | -        | 0    | Malignant |            |
| BR10010a   | D1       | Breast                                                           | Invasive duct  |       | 2 IIb  | T2N1M0 | -        | -        | 0    | Malignant |            |
| BR10010a   | D2       | Breast                                                           | Invasive duct  |       | 2 IIb  | T2N1M0 | +++ ,95% | +++ ,50% | 0    | Malignant |            |
| BR10010a   | D3       | Breast                                                           | Invasive duct  |       | 3 IIb  | T3N1M0 | + ,10%   | -        | 0    | Malignant |            |
| BR10010a   | D4       | Breast                                                           | Invasive duct  |       | 2 IIb  | T2N1M0 | ++ ,90%  | -        | 2+   | Malignant |            |
| BR10010a   | D5       | Breast                                                           | Invasive duct  |       | 2 IIb  | T3N1M0 | -        | -        | 0    | Malignant |            |
| BR10010a   | D6       | Breast                                                           | Invasive duct  |       | 2 IIIa | T3N2M0 | + ,8%    | -        | 1+   | Malignant |            |
| BR10010a   | D7       | Breast                                                           | Invasive duct  |       | 2 IIb  | T3N1M0 | ++ ,25%  | -        | 3+   | Malignant |            |
| BR10010a   | D8       | Breast                                                           | Invasive duct  |       | 2 IIb  | T2N1M0 | -        | -        | 0    | Malignant |            |
| BR10010a   | D9       | Breast                                                           | Invasive duct  |       | 2 IIb  | T2N1M0 | -        | ++ ,70%  | 0    | Malignant |            |
| BR10010a   | D10      | Breast                                                           | Invasive duct  |       | 2 IIIa | T2N2M0 | -        | -        | 3+   | Malignant |            |
| BR10010a   | E1       | Breast                                                           | Invasive duct  |       | 2 IIb  | T3N1M0 | + ,5%    | ++ ,8%   | 0    | Malignant |            |
| BR10010a   | E2       | Breast                                                           | Invasive duct  |       | 2 IIIa | T2N2M0 | + ,5%    | +++ ,95% | 0    | Malignant |            |
| BR10010a   | E3       | Breast                                                           | Invasive duct  |       | 3 IIb  | T3N1M0 | -        | -        | 0    | Malignant |            |
| BR10010a   | E4       | Breast                                                           | Invasive duct  |       | 2 IIIb | T4N2M0 | -        | -        | 1+   | Malignant |            |
| BR10010a   | E5       | Breast                                                           | Invasive duct  |       | 3 IIb  | T2N1M0 | -        | -        | 0    | Malignant |            |
| BR10010a   | E6       | Breast                                                           | Invasive duct  |       | 3 IIb  | T2N1M0 | -        | -        | 3+   | Malignant |            |
| BR10010a   | E7       | Breast                                                           | Invasive micr- |       | IIb    | T2N1M0 | -        | -        | 3+   | Malignant |            |
| BR10010a   | E8       | Breast                                                           | Invasive lobu- |       | IIb    | T2N1M0 | -        | -        | 0    | Malignant |            |
| BR10010a   | E9       | Breast                                                           | Invasive lobu- |       | IIb    | T2N1M0 | -        | -        | 0    | Malignant |            |
| BR10010a   | E10      | Breast                                                           | Neuroendocr-   |       | IIb    | T2N1M0 | +++ ,45% | -        | 1+   | Malignant |            |
| BR10010a   | F1       | Lymph node Metastatic carcinoma from breast (lymph node tissue)- |                |       |        |        |          |          |      | 0-        | Metastasis |
| BR10010a   | F2       | Lymph node Metastatic carcinoma from breast-                     |                |       |        |        |          |          |      | 3+        | Metastasis |
| BR10010a   | F3       | Lymph node Metastatic carcinoma from breast-                     |                |       |        |        | ++ ,100% | ++ ,100% |      | 0         | Metastasis |
| BR10010a   | F4       | Lymph node Metastatic carcinoma from breast-                     |                |       |        |        |          | ++ ,90%  |      | 0         | Metastasis |
| BR10010a   | F5       | Lymph node Metastatic carcinoma from breast-                     |                |       |        |        |          |          |      | 0         | Metastasis |
| BR10010a   | F6       | Lymph node Metastatic carcinoma from breast-                     |                |       |        |        |          |          |      | 3+        | Metastasis |
| BR10010a   | F7       | Lymph node Metastatic carcinoma from breast-                     |                |       |        |        | + ,80%   |          |      | 2+        | Metastasis |
| BR10010a   | F8       | Lymph node Metastatic carcinoma from breast-                     |                |       |        |        |          | +++ ,45% |      | 2+        | Metastasis |
| BR10010a   | F9       | Lymph node Metastatic carcinoma from breast-                     |                |       |        |        | +++ ,95% | +++ ,99% |      | 0         | Metastasis |
| BR10010a   | F10      | Lymph node Metastatic carcinoma from breast-                     |                |       |        |        |          |          |      | 0         | Metastasis |
| BR10010a   | G1       | Lymph node Metastatic carcinoma from breast-                     |                |       |        |        |          |          |      | 1+        | Metastasis |
| BR10010a   | G2       | Lymph node Metastatic carcinoma from breast-                     |                |       |        |        | ++ ,95%  | +++ ,99% |      | 0         | Metastasis |
| BR10010a   | G3       | Lymph node Metastatic carcinoma from breast-                     |                |       |        |        |          |          |      | 3+        | Metastasis |
| BR10010a   | G4       | Lymph node Metastatic carcinoma from breast-                     |                |       |        |        | ++ ,80%  | +++ ,70% |      | 0         | Metastasis |
| BR10010a   | G5       | Lymph node Metastatic carcinoma from breast-                     |                |       |        |        |          |          |      | 3+        | Metastasis |
| BR10010a   | G6       | Lymph node Metastatic carcinoma from breast-                     |                |       |        |        |          |          |      | 3+        | Metastasis |
| BR10010a   | G7       | Lymph node Metastatic carcinoma from breast-                     |                |       |        |        |          | ++ ,40%  |      | 0         | Metastasis |
| BR10010a   | G8       | Lymph node Metastatic carcinoma from breast-                     |                |       |        |        |          |          |      | 3+        | Metastasis |
| BR10010a   | G9       | Lymph node Metastatic carcinoma from breast-                     |                |       |        |        |          |          |      | 3+        | Metastasis |
| BR10010a   | G10      | Lymph node Metastatic carcinoma from breast-                     |                |       |        |        | + ,10%   | + ,5%    |      | 0         | Metastasis |
| BR10010a   | H1       | Lymph node Metastatic carcinoma from breast-                     |                |       |        |        |          | ++ ,80%  |      | 1+        | Metastasis |
| BR10010a   | H2       | Lymph node Metastatic carcinoma from breast-                     |                |       |        |        | +++ ,90% |          |      | 0         | Metastasis |
| BR10010a   | H3       | Lymph node Metastatic carcinoma from breast-                     |                |       |        |        |          |          |      | 3+        | Metastasis |
| BR10010a   | H4       | Lymph node Metastatic carcinoma from breast-                     |                |       |        |        |          | + ,5%    |      | 0         | Metastasis |
| BR10010a   | H5       | Lymph node Metastatic carcinoma from breast-                     |                |       |        |        |          |          |      | 0         | Metastasis |
| BR10010a   | H6       | Lymph node Metastatic carcinoma from breast-                     |                |       |        |        |          |          |      | 3+        | Metastasis |
| BR10010a   | H7       | Lymph node Metastatic carcinoma from breast-                     |                |       |        |        |          |          |      | 3+        | Metastasis |
| BR10010a   | H8       | Lymph node Metastatic carcinoma from breast-                     |                |       |        |        |          |          |      | 3+        | Metastasis |
| BR10010a   | H9       | Lymph node Metastatic carcinoma from breast-                     |                |       |        |        | + ,30%   | +++ ,95% |      | 0         | Metastasis |
| BR10010a   | H10      | Lymph node Metastatic carcinoma from breast-                     |                |       |        |        |          |          |      | 0         | Metastasis |
| BR10010a   | I1       | Lymph node Metastatic carcinoma from breast-                     |                |       |        |        |          |          |      | 0         | Metastasis |
| BR10010a   | I2       | Lymph node Metastatic carcinoma from breast-                     |                |       |        |        | ++ ,25%  |          |      | 3+        | Metastasis |
| BR10010a   | I3       | Lymph node Metastatic carcinoma from breast-                     |                |       |        |        |          |          |      | 0         | Metastasis |
| BR10010a   | I4       | Lymph node Metastatic carcinoma from breast-                     |                |       |        |        | + ,15%   | +++ ,5%  |      | 2+        | Metastasis |
| BR10010a   | I5       | Lymph node Metastatic carcinoma from breast-                     |                |       |        |        | + ,15%   | + ,5%    |      | 0         | Metastasis |
| BR10010a   | I6       | Lymph node Metastatic carcinoma from breast-                     |                |       |        |        |          |          |      | 1+        | Metastasis |
| BR10010a   | I7       | Lymph node Metastatic carcinoma from breast-                     |                |       |        |        | + ,20%   |          |      | 3+        | Metastasis |
| BR10010a   | I8       | Lymph node Metastatic carcinoma from breast-                     |                |       |        |        |          |          |      | 0         | Metastasis |
| BR10010a   | I9       | Lymph node Metastatic carcinoma from breast-                     |                |       |        |        |          | + ,5%    |      | 0         | Metastasis |
| BR10010a   | I10      | Lymph node Metastatic carcinoma from breast-                     |                |       |        |        |          |          |      | 3+        | Metastasis |
| BR10010a   | J1       | Lymph node Metastatic carcinoma from breast-                     |                |       |        |        | + ,20%   | ++ ,3%   |      | 0         | Metastasis |
| BR10010a   | J2       | Lymph node Metastatic carcinoma from breast-                     |                |       |        |        |          | + ,3%    |      | 0         | Metastasis |
| BR10010a   | J3       | Lymph node Metastatic carcinoma from breast-                     |                |       |        |        |          |          |      | 1+        | Metastasis |
| BR10010a   | J4       | Lymph node Metastatic carcinoma from breast-                     |                |       |        |        |          |          |      | 0         | Metastasis |
| BR10010a   | J5       | Lymph node Metastatic carcinoma from breast-                     |                |       |        |        |          |          |      | 0         | Metastasis |
| BR10010a   | J6       | Lymph node Metastatic carcinoma from breast (sparse)-            |                |       |        |        |          |          |      | 2+        | Metastasis |
| BR10010a   | J7       | Lymph node Metastatic carcinoma from breast-                     |                |       |        |        |          |          |      | 2+        | Metastasis |
| BR10010a   | J8       | Lymph node Metastatic carcinoma from breast-                     |                |       |        |        |          |          |      | 0         | Metastasis |
| BR10010a   | J9       | Lymph node Metastatic carcinoma from breast-                     |                |       |        |        |          |          |      | 0         | Metastasis |
| BR10010a   | J10      | Lymph node Metastatic carcinoma from breast-                     |                |       |        |        | +++ ,90% |          |      | 1+        | Metastasis |

**Supplementary Table 5: Clinical and molecular characteristics of breast cancer cells and mammary epithelial cells.**

|    | Cell line           | <sup>a</sup> Gene cluster | <sup>a</sup> Derived Tumor type | <sup>a</sup> Tumo-rigenic | <sup>a</sup> ER | <sup>a</sup> PR | <sup>a</sup> HER2 |
|----|---------------------|---------------------------|---------------------------------|---------------------------|-----------------|-----------------|-------------------|
| 1  | 184B5               | NA                        | N, MG                           | No                        | NA              | NA              | NA                |
| 2  | AU565a              | Luminal                   | AC                              | NA                        | -               | -               | +                 |
| 3  | BT20                | Basal A                   | IDC                             | Yes                       | -               | -               | -                 |
| 4  | BT474               | Luminal                   | IDC                             | Yes                       | +               | +               | +                 |
| 5  | BT483               | Luminal                   | IDC                             | Yes                       | +               | +               | -                 |
| 6  | BT549               | Basal B                   | IDC                             | Yes                       | -               | -               | -                 |
| 7  | CAMA1               | Luminal                   | AC                              | Yes                       | +               | -               | -                 |
| 8  | DU4475              | NA                        | IDC                             | Yes                       | -               | -               | -                 |
| 9  | HCC38               | Basal B                   | DCIS                            | NA                        | -               | -               | -                 |
| 10 | HCC70               | Basal A                   | DCIS                            | NA                        | +               | -               | -                 |
| 11 | HCC202              | Luminal                   | DCIS                            | NA                        | -               | -               | +                 |
| 12 | HCC1187             | Basal A                   | DCIS                            |                           | -               | -               | -                 |
| 13 | HCC1395             | Basal B                   | DCIS                            |                           | -               | -               | -                 |
| 14 | HCC1419             | Luminal                   | DCIS                            |                           | -               | -               | +                 |
| 15 | HCC1428             | Luminal                   | Met adenoca                     |                           | +               | +               | -                 |
| 16 | HCC1500             | Basal B                   | DCIS                            | NA                        | -               | -               | -                 |
| 17 | HCC1569             | Basal A                   | MC                              | NA                        | -               | -               | +                 |
| 18 | HCC1599             | Basal A                   | DCIS                            |                           | -               | -               | -                 |
| 19 | HCC1806             | NA                        | ASC                             |                           | -               | -               | -                 |
| 20 | HCC1937             | Basal A                   | DCIS                            | NA                        | -               | -               | -                 |
| 21 | HCC1954             | Basal A                   | DCIS                            |                           | NA              | NA              | NA                |
| 22 | HCC2157             | Basal A                   | DCIS                            |                           | -               | +               | +                 |
| 23 | HCC2218             | Luminal                   | MLCa                            |                           | -               | -               | +                 |
| 24 | HS578T              | Basal B                   | IDC                             | No                        | -               | -               | -                 |
| 25 | MCF7                | Luminal                   | IDC                             | Yes                       | +               | +               | -                 |
| 26 | MCF10A              | Basal B                   | F                               | No                        | -               | -               | -                 |
| 27 | MCF10F              | Basal B                   | F                               | No                        | -               | -               | -                 |
| 28 | MCF12A              | Basal B                   | F                               | No                        | -               | -               | -                 |
| 29 | <sup>b</sup> MDAKb2 | Luminal                   | AC                              | No                        | -               | -               | -                 |
| 30 | MDA-MB-134VI        | Luminal                   | IDC                             | Yes                       | +               | -               | -                 |
| 31 | MDA-MB-157          | Basal B                   | MC                              | Yes                       | -               | -               | -                 |
| 32 | MDA-MB-175VII       | Luminal                   | IDC                             | Yes                       | +               | -               | -                 |
| 33 | MDA-MB-231          | Basal B                   | AC                              | Yes                       | -               | -               | +                 |
| 34 | MDA-MB-361          | Luminal                   | AC                              | Yes                       | +               | -               | -                 |
| 35 | MDA-MB-415          | Luminal                   | AC                              | No                        | +               | -               | -                 |
| 36 | MDA-MB-436          | Basal B                   | IDC                             | No                        | -               | -               | -                 |
| 37 | MDA-MB-453          | Luminal                   | AC                              | No                        | -               | -               | -                 |
| 38 | MDA-MB-468          | Basal A                   | AC                              | Yes                       | -               | -               | -                 |
| 39 | SKBR3               | Luminal                   | AC                              | Yes                       | -               | -               | +                 |
| 40 | T47D                | Luminal                   | AnCa                            | Yes                       | +               | +               | +                 |
| 41 | UACC812             | Luminal                   | IDC                             | NA                        | +               | -               | -                 |
| 42 | UACC893             | Luminal                   | IDC                             | NA                        | -               | -               | -                 |
| 43 | ZR751               | Luminal                   | IDC                             | Yes                       | +               | -               | -                 |
| 44 | ZR7530              | Luminal                   | IDC                             | NA                        | +               | -               | +                 |
| 45 | MDA-MB-435          | Basal B                   | IDC                             | NA                        | -               | -               | -                 |
| 46 | HBL100              | Basal B                   | N, BM                           | Yes                       | +               | -               | -                 |

## Supplementary Table 5

AC, adenocarcinoma; AnCa, anaplastic carcinoma; ASC, acantholytic squamous carcinoma; BM, breast milk; DCIS, ductal carcinoma in situ; F, fibrocystic disease; IDC, invasive ductal carcinoma; MC, metaplastic carcinoma; Met adenoca, Metastatic adenocarcinoma; MG, mammary gland; MLCa, metastatic lobular carcinoma; N, normal (non-tumor-derived cells); NA, Not available, undetermined or unknown events.

The highest expression of BRK occurs in IDC in bold.

No expression is indicated by (-) and positive expression by (+).

Discrepancies in expression are denoted by (+/-).

<sup>a</sup>These specifications were compiled using published data from Neve *et al.* [22] and Gazdar *et al.* [23] and also from information provided by ATCC for all cell lines except for HBL100 whose specifications came from Cell Lines Services. Additional information on DU4475 and the HCC series of cell lines came from Langlois *et al.* [24] and Kao *et al.* [25].

<sup>b</sup>MDAKb2 was derived from MDA-MB-453 cells stably transformed with the MMTV.luciferase.neo reporter gene construct by Wilson *et al.* [26].
