# Supplementary material for: Estrogen receptor signaling regulates the expression of the breast tumor kinase in breast cancer cells
Source: PubMed Central journal article supplement (PMC6335685; doi:10.1186/s12885-018-5186-8), 2019-01-16

# Supplementary Figure 1

**A**

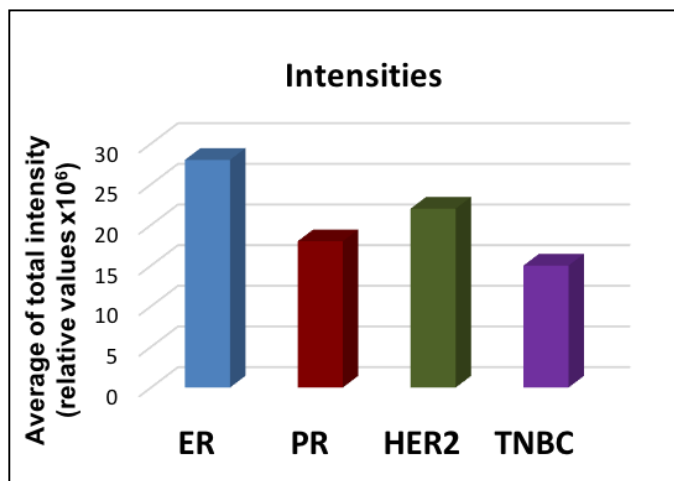

**B**

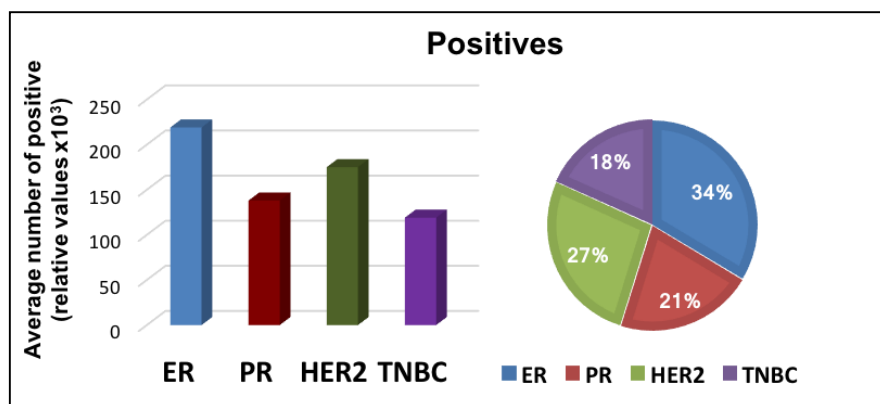

## Supplementary Figure 2

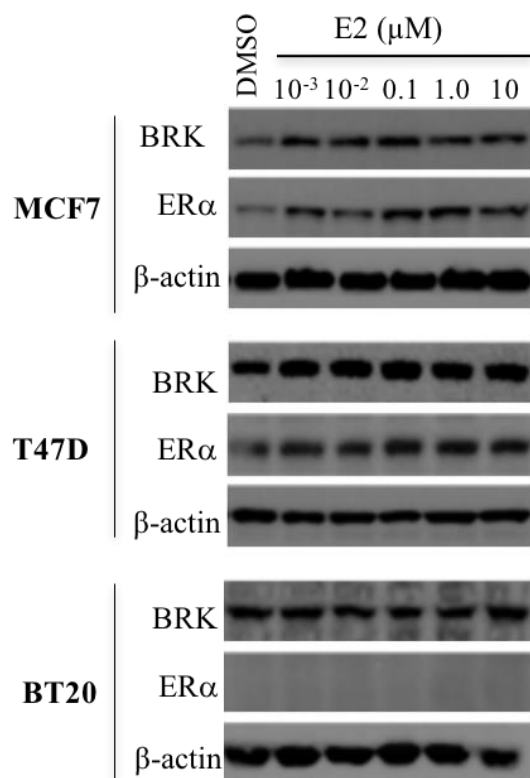

# Supplementary Figure 3

**A**

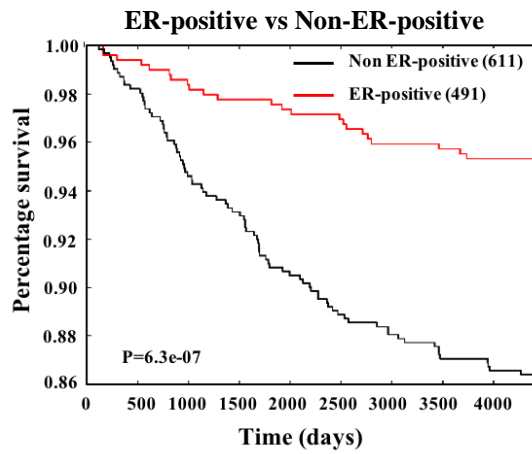

**B**

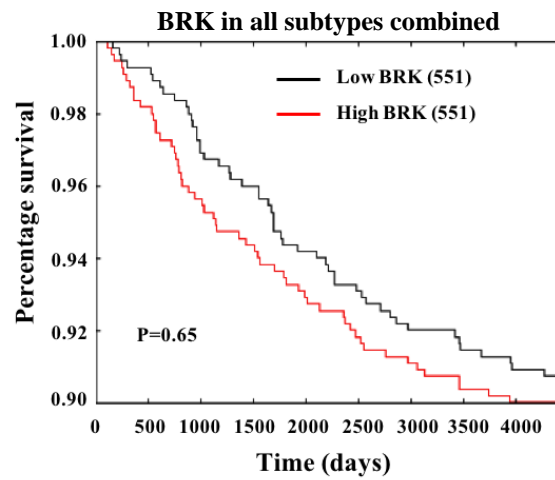

**C**

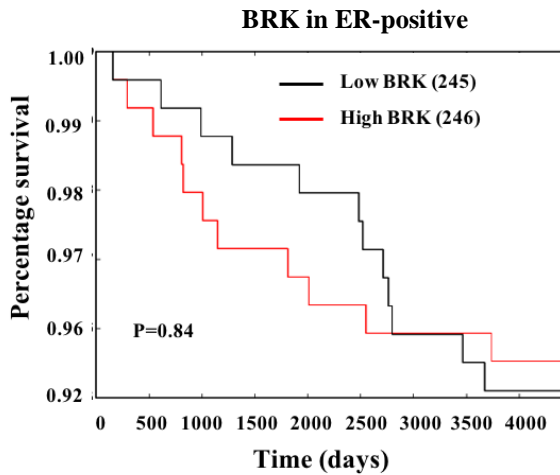

# Supplementary Figure 3

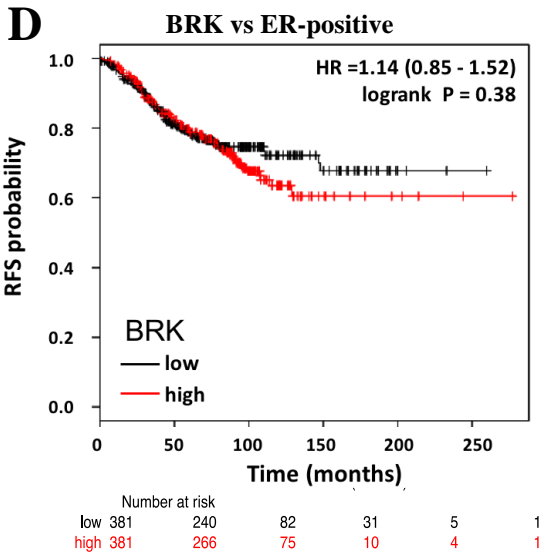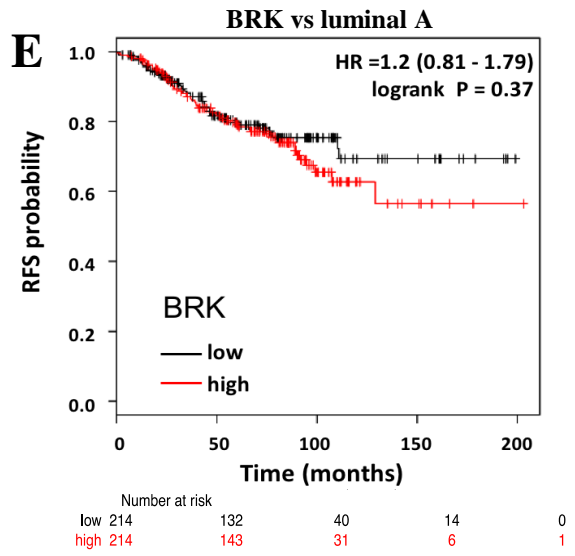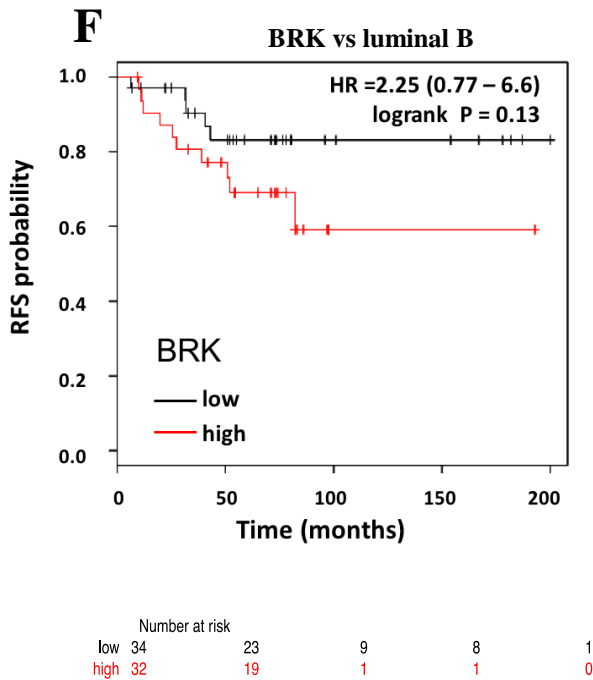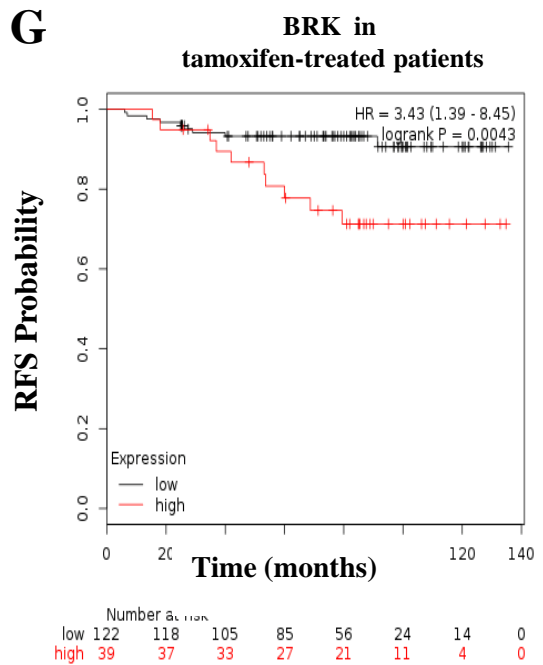

Supplement: 12885_2018_5186_MOESM2_ESM.pdf [file 12885_2018_5186_MOESM2_ESM.pdf]
